# Supplementary material for: The utility of polarization modulation infrared reflection absorption spectroscopy (PM-IRRAS) in surface and in situ studies: new data processing and presentation approach
Source: Royal Society of Chemistry journal article supplement (doi:10.1039/c8an00572a), 2018-01-01
Supplement: c8an00572a1.pdf [file c8an00572a1.pdf]

## Supporting Information

# Utility of Polarization Modulation Infrared Reflection Absorption Spectroscopy (PM-IRRAS) in Surface and *In-situ* Studies: New Data Processing and Presentation Approach

*Evans A. Monyoncho, <sup>a, b</sup> Vlad Zamlyunny, <sup>c</sup> Tom K. Woo, <sup>b</sup> and Elena A. Baranova <sup>a\*</sup>*

<sup>a</sup> Department of Chemical and Biological Engineering, Center for Catalysis Research and Innovation (CCRI), University of Ottawa, 161 Louis-Pasteur St., Ottawa, Ontario, K1N 6N5, Canada

<sup>b</sup> Department of Chemistry and Biomolecular Science, CCRI, University of Ottawa, 161 Louis-Pasteur St., Ottawa, ON K1N 6N5, Canada

<sup>c</sup> Chemistry Department, Acadia University, 6 University Avenue, Wolfville, Nova Scotia, B4P 2R6, Canada,

## PM-IRRAS Spectrometer components and working principle

This is a Bruker's Tensor 37 FTIR spectrometer equipped with PMA 50 chamber for spectroelectrochemical experiments.

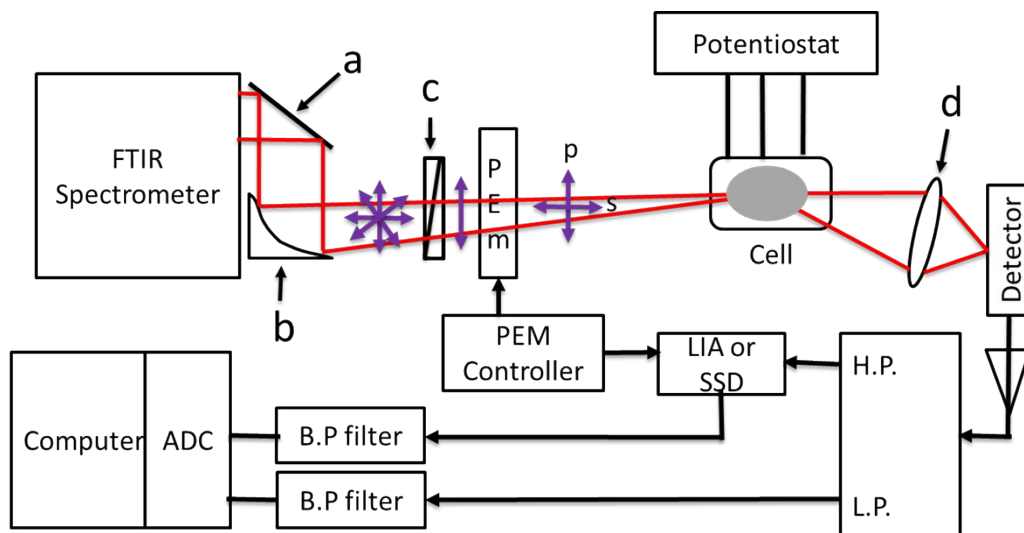

**Figure S1:** PM-IRRAS instrumentation schematic showing IR radiation optical path (red color) the positions for the mirrors (flat (a) and parabolic (b)), static polarizer (c), photoelastic modulator (PEM), spectroelectrochemical cell, focusing lens (d), detector, and data processing electronics, i.e., High Pass (H.P.) and Low Pass (L.P.) filters, Band Pass (B.P) filters, and Analog to Digital Converters (ADC). The non-polarized IR radiation from the spectrometer is reflected by a flat mirror (a) to a parabolic mirror (b) which converges the radiation to its focal point at the cell electrode via the static polarizer (c) and PEM. The static polarizer generates p-polarized light which is modulated by the PEM controller at 100 kHz to generate s-polarization with respect to the electrode surface. The p- and s-radiation go through the cell, and then are focused with the lens (d) to the detector at a pre-determined optimum angle. The detected signal is amplified and split into two channels (see text for details).

The non-polarized IR beam from the spectrometer is reflected by a flat mirror (a) at 45° to a parabolic mirror (b) which converges the radiation to its focal point ( $f = 160$  mm) at electrode in the cell via the static metal grid polarizer (1-inch diameter ZnSe substrate, Bruker) and photoelastic modulator (PEM). The static polarizer generates p-polarized light which is then modulated by the PEM controller at 100 kHz to generate both p- and s-polarizations with respect to the electrode surface. The p- and s-radiations go through the cell (sample) and are reflected at a pre-determined optimum angle (*vide infra*) by the electrode via a focusing lens (1-inch diameter ZnSe, (d)) to the detector. The detected signal is amplified

and split into two signals; the absolute difference signal  $|J_2(R_p - R_s)|$  and the average signal  $(R_p + R_s)/2$ . The (absolute) difference signal goes through the H.P. filter into the demodulator (LIA or SSD) where a reference signal from the PEM controller is provided and then sent through the B.P. filter.<sup>5</sup> The average signal obtained at the L.P. and is passed directly into B.P. filter. The signals from the two channels are digitized and saved separately as interferograms for further processing by the user. The signal processing electronics, High Pass (H.P.) and (L.P.) filters, Band Pass (B.P.) filters, Analog to Digital Converter (ADC), and the computer are part of the Bruker setup. Electrode potential was controlled by a BioLogic VSP potentiostat equipped with the EC-Lab software (Bio-Logic Science Instruments SAS, Claix, France).

### Optimum experimental set up conditions

Figure S2 demonstrates that setting the angle of incidence to the range between 60 and 64 degrees and keeping the thin-cavity distance as small as possible should yield the best MSEFS at the surface. The obtained values of the MSEFS are about twice lower compared to highly reflective metal surfaces for which MSEFS reaches 4x enhancement. However, the values close to the magnitude of 2 indicate that there should be at least 2x enhancements with respect to the incident light.

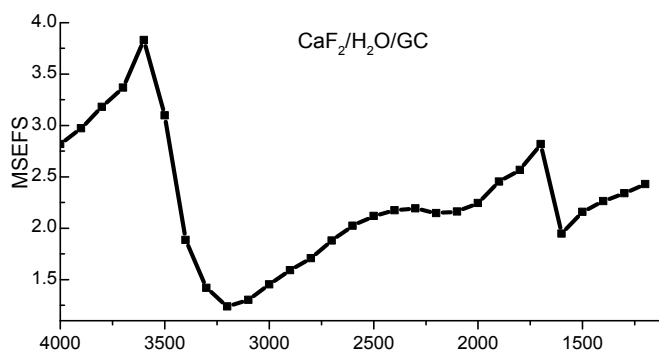

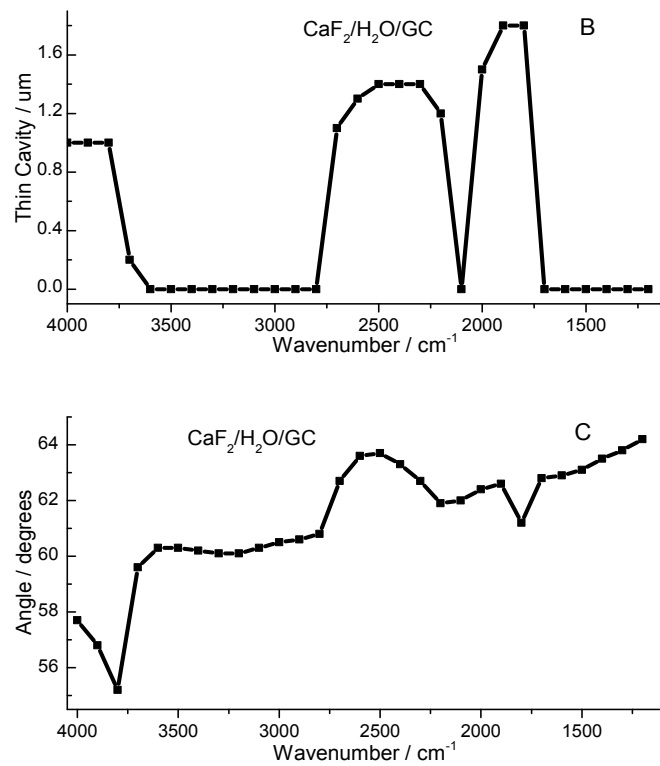

**Figure S2:** Coordinates of the global maximum in the MSEFS for CaF<sub>2</sub>/H<sub>2</sub>O/GC system calculated in the mid infrared region for the beam of  $\pm 3^\circ$  convergence (Figures with values obtained with a convergence of 5 was used.) Panels A, B, and C show the optimum values of the MSEFS, the electrolyte thin cavity thickness and the angle of incidence, respectively.
